# Supplementary material for: Graphitic Carbon-Coated FeSe2 Hollow Nanosphere-Decorated Reduced Graphene Oxide Hybrid Nanofibers as an Efficient Anode Material for Sodium Ion Batteries
Source: PubMed Central journal article supplement (PMC4817055; doi:10.1038/srep23699), 2016-04-01
Supplement: srep23699-s1.pdf [file srep23699-s1.pdf]

# Supporting Information

## Graphitic Carbon-Coated FeSe<sub>2</sub> Hollow Nanosphere-Decorated Reduced Graphene Oxide Hybrid Nanofibers as an Efficient Anode Material for Sodium Ion Batteries

*Jung Sang Cho<sup>1</sup>, Jung-Kul Lee<sup>2,\*</sup>, and Yun Chan Kang<sup>1,\*</sup>*

J.S. Cho, Prof. J.K. Lee and Prof. Y.C. Kang

<sup>1</sup>Department of Materials Science and Engineering, Korea University, Anam-Dong, Seongbuk-Gu, Seoul 136-713, Republic of Korea, E-mail: [yckang@korea.ac.kr](mailto:yckang@korea.ac.kr)

<sup>2</sup>Department of Chemical Engineering, Konkuk University, 1 Hwayang-dong, Gwangjin-gu, Seoul 143-701, Republic of Korea, E-mail: [jkrhee@konkuk.ac.kr](mailto:jkrhee@konkuk.ac.kr)

Keywords: iron selenide, sodium ion batteries, Kirkendall effect, graphene, carbon composite, electrospinning

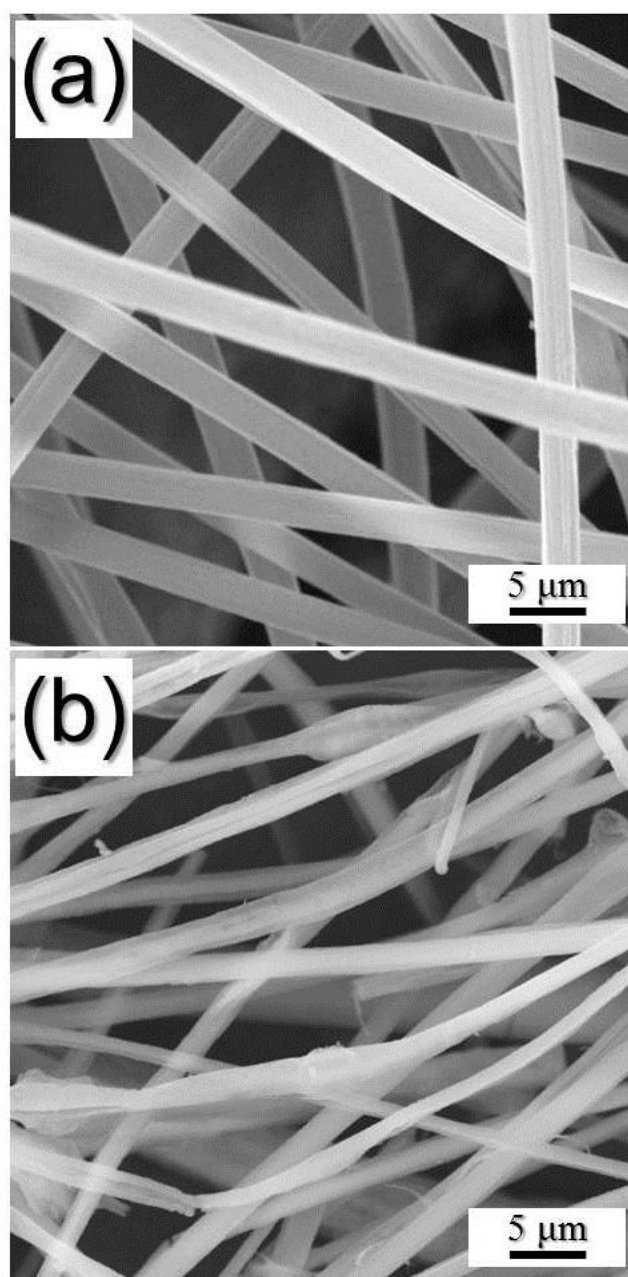

**Figure S1** SEM images of the (a) as-spun  $\text{Fe}(\text{acac})_3$ -PAN-PS composite nanofibers and (b) stabilized nanofibers treated at 120 °C under air atmosphere.

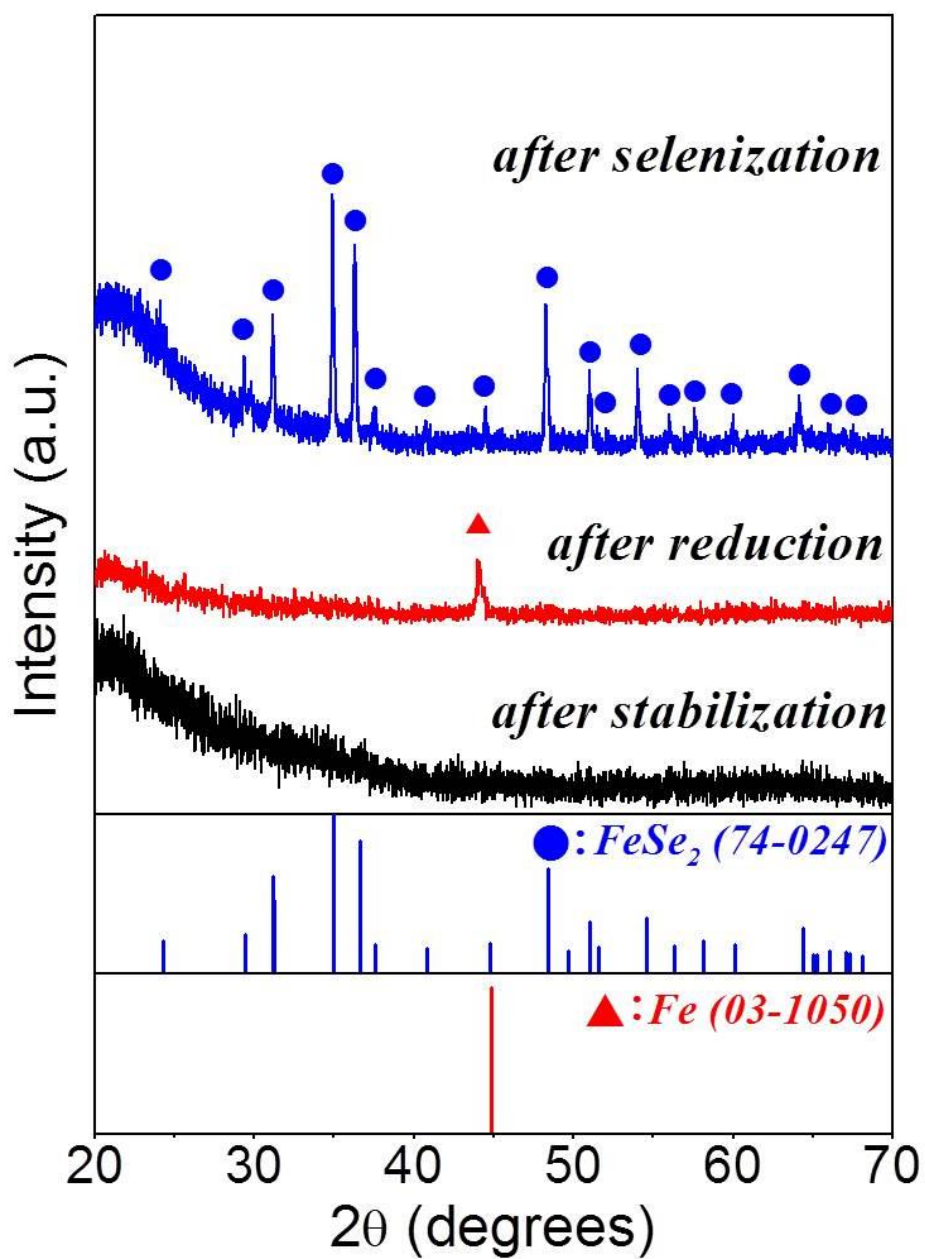

**Figure S2.** XRD patterns of the nanofibers obtained after stabilization process, subsequent reduction process, and final selenization process.

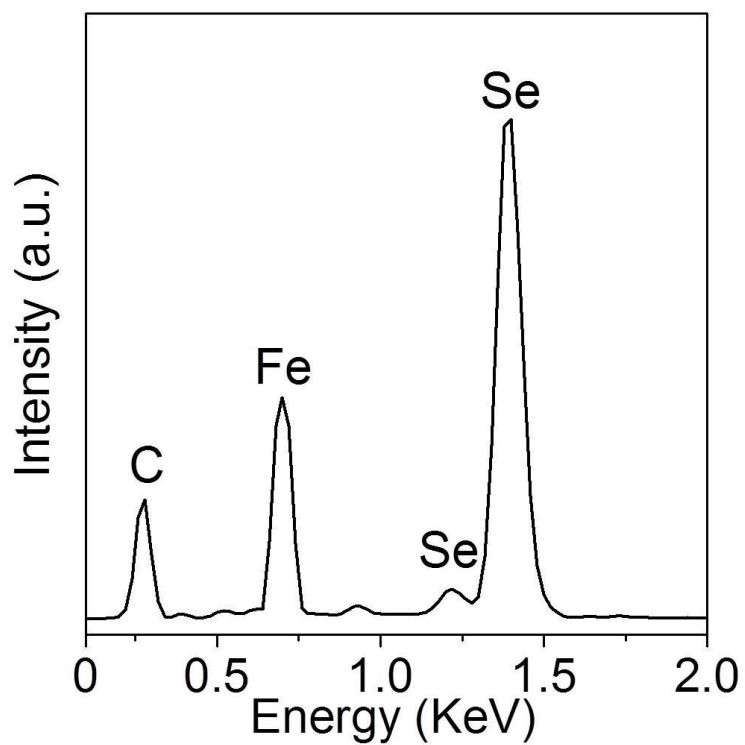

**Figure S3.** Energy dispersive spectroscopy (EDS) of the hollow nanosphere  $\text{FeSe}_2$ @GC-rGO hybrid nanofibers formed by selenization process.

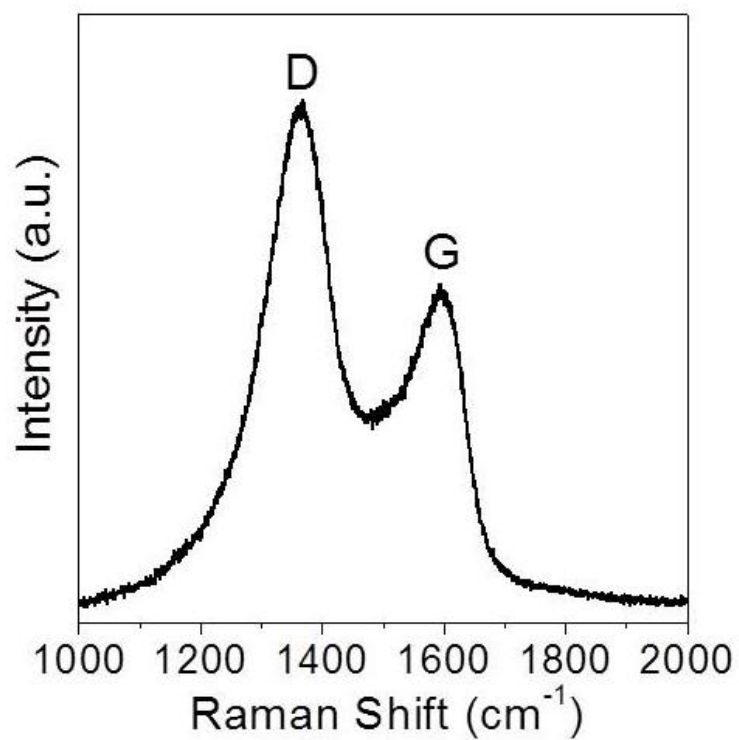

**Figure S4.** Raman spectrum of the hollow nanosphere FeSe<sub>2</sub>@GC-rGO hybrid nanofibers formed by selenization process.

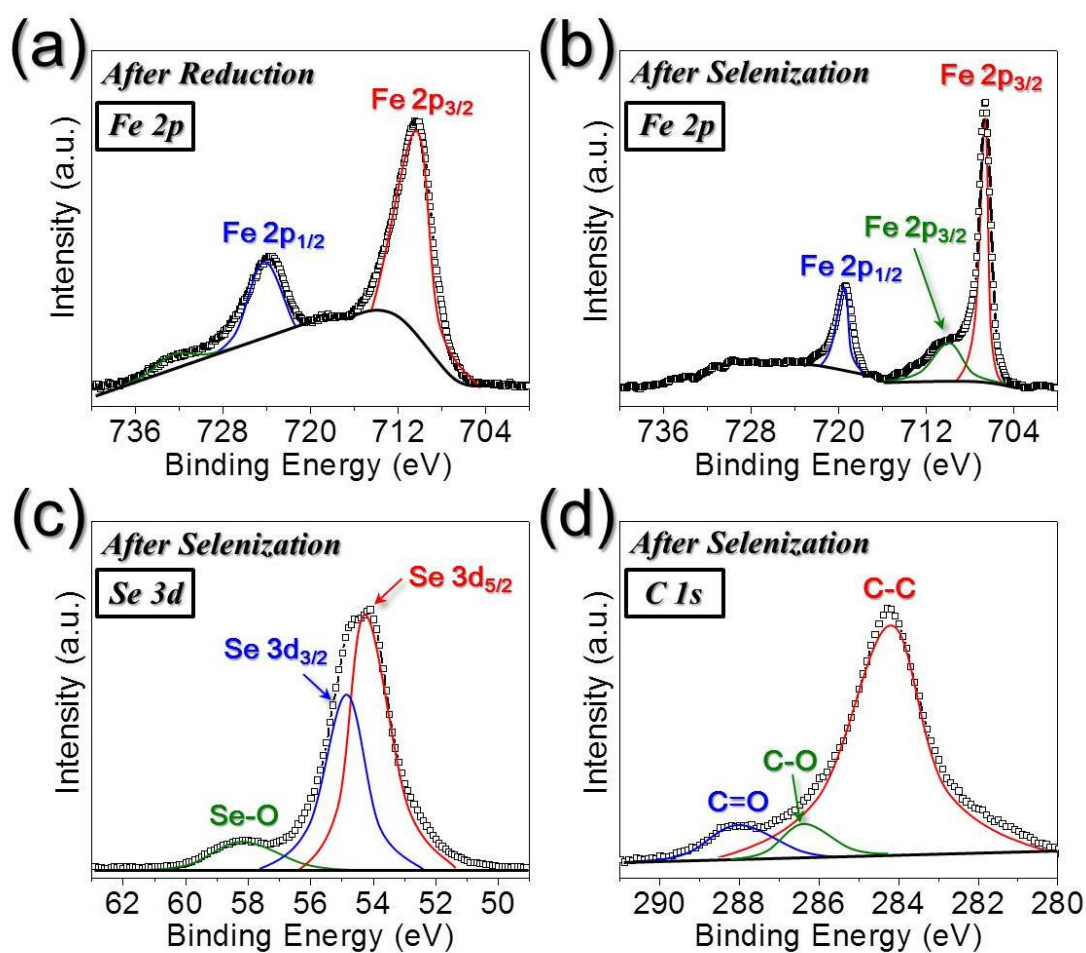

**Figure S5.** XPS spectra of the (a) Fe-rGO-GC hybrid nanofibers and (b-d) hollow nanosphere FeSe<sub>2</sub>@GC-rGO hybrid nanofibers: (a,b) Fe 2p, (c) Se 3d, and (d) C 1s.

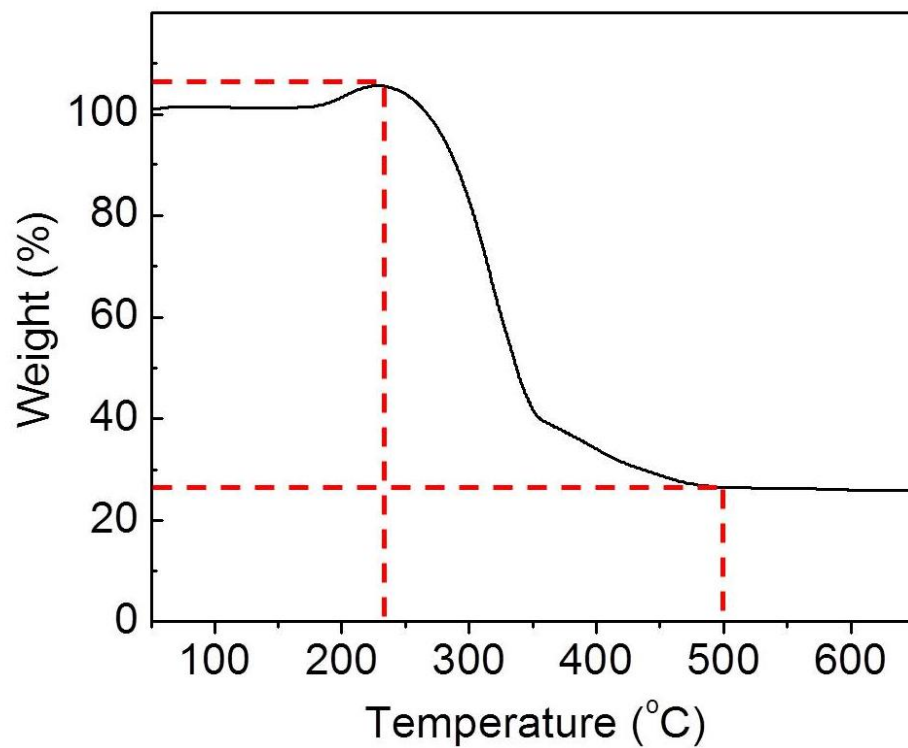

**Figure S6.** TG curve of the hollow nanosphere  $\text{FeSe}_2$ @GC-rGO hybrid nanofibers obtained after selenization process.

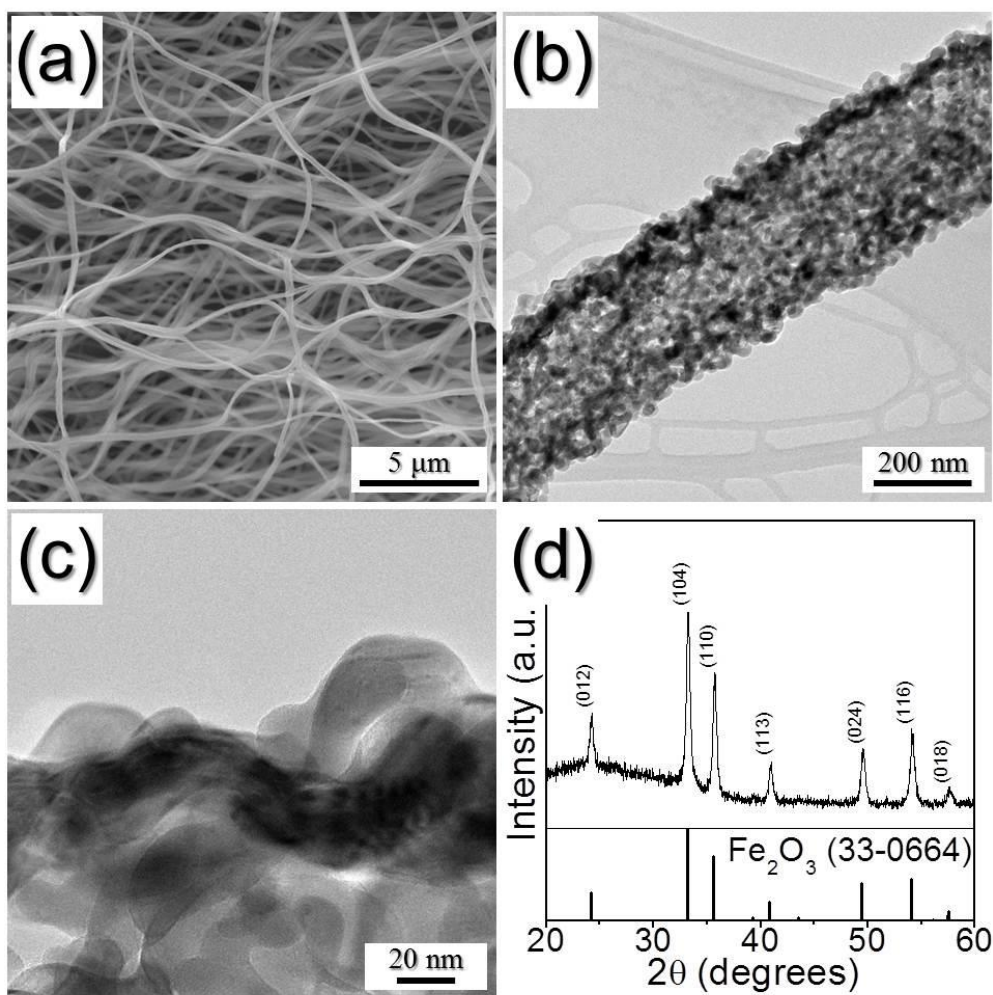

**Figure S7.** Morphologies and XRD pattern of the bare Fe<sub>2</sub>O<sub>3</sub> nanofibers obtained after oxidation process of the Fe(acac)<sub>3</sub>-PAN-PS composite nanofibers under air atmosphere at 500 °C: (a) SEM image, (b,c) TEM images, and (d) XRD pattern.



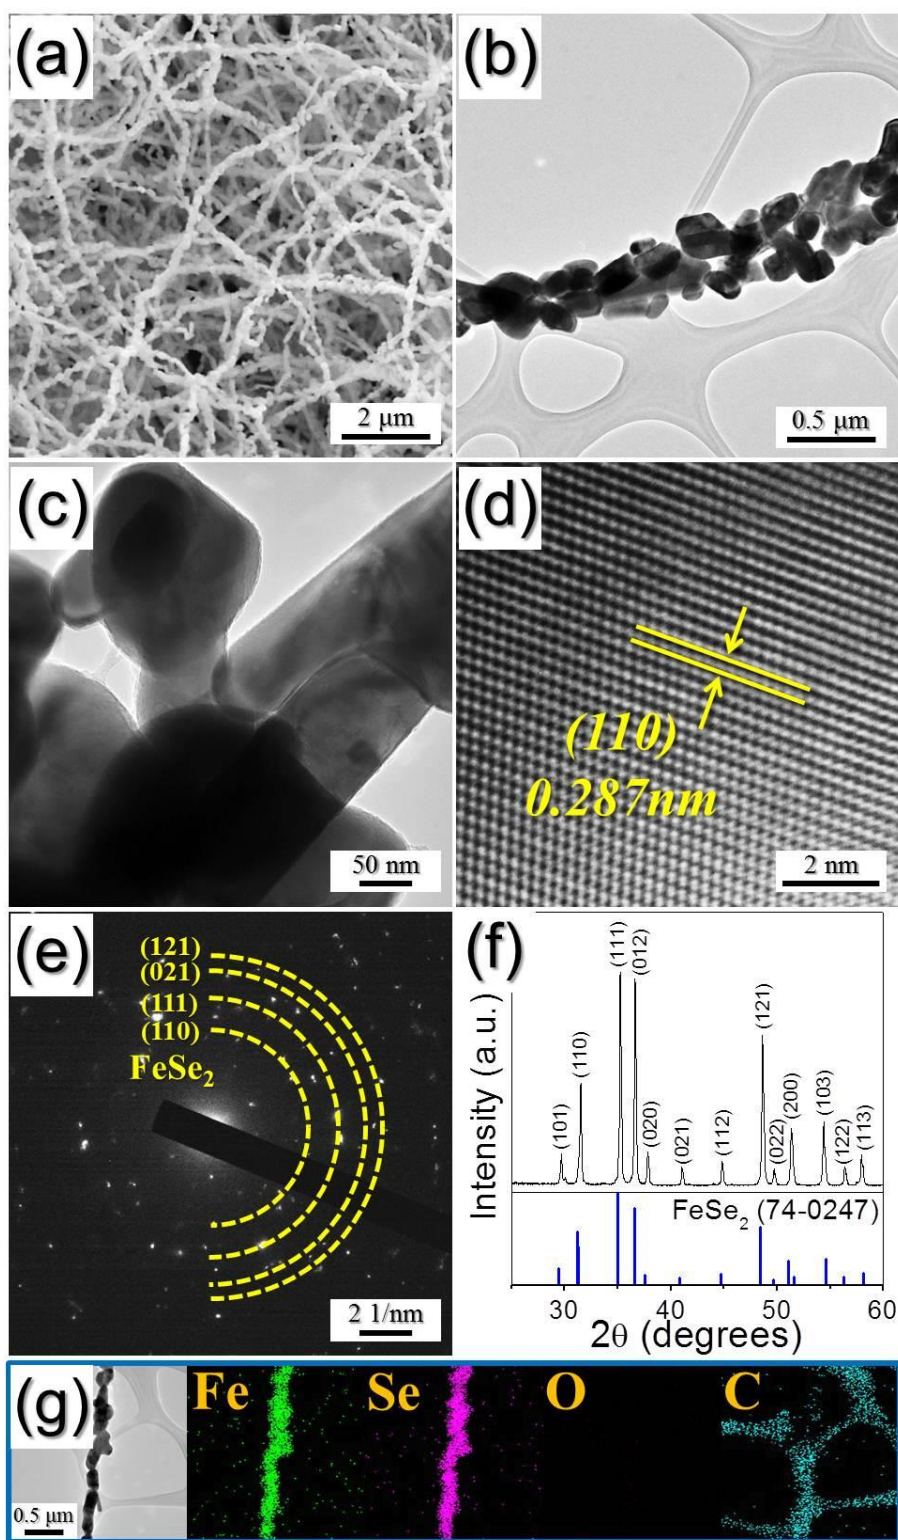

**Figure S8.** Morphologies, SAED pattern, XRD pattern, and elemental mapping images of the bare FeSe<sub>2</sub> nanofibers: (a) SEM, (b,c) TEM images, (d) HR-TEM image, (e) SAED pattern, (f) XRD pattern, and (g) elemental mapping images.

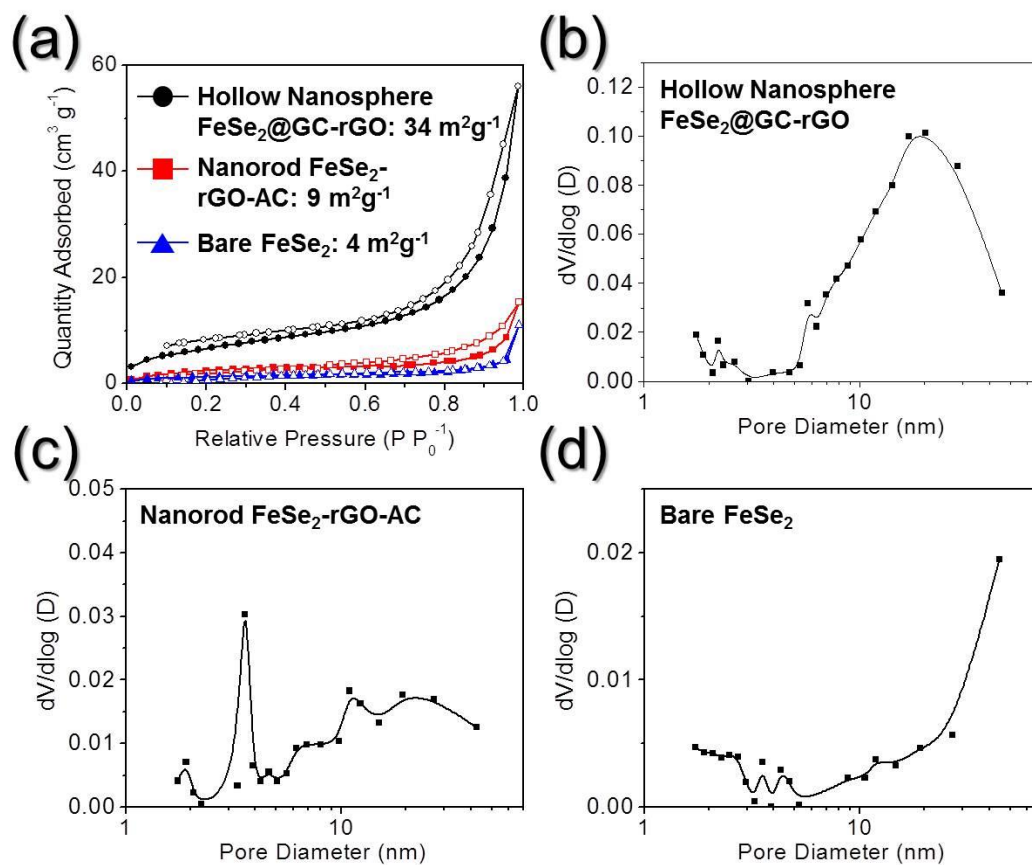

**Figure S9.** (a) N<sub>2</sub> gas adsorption and desorption isotherms and pore size distributions of (b) hollow nanosphere FeSe<sub>2</sub>@GC-rGO hybrid nanofibers, (c) nanorod FeSe<sub>2</sub>-rGO-AC hybrid nanofibers, and (d) bare FeSe<sub>2</sub> nanofibers.

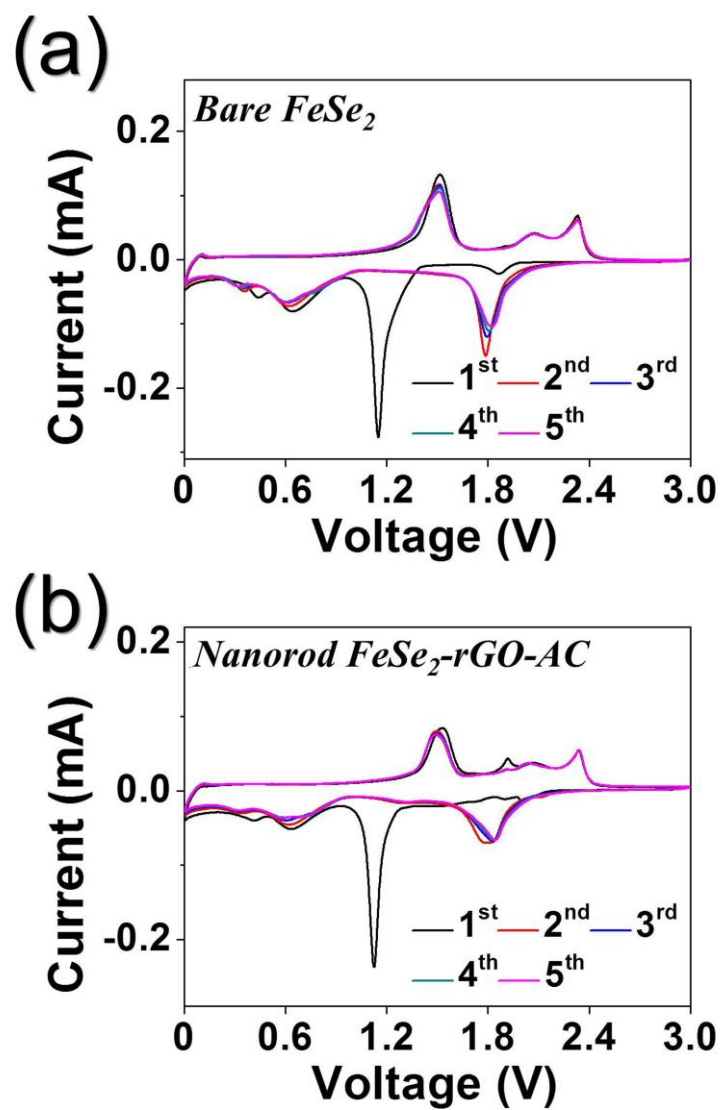

**Figure S10.** CV curves of the (a) nanorod FeSe<sub>2</sub>-rGO-AC hybrid nanofibers and (b) bare FeSe<sub>2</sub> nanofibers.

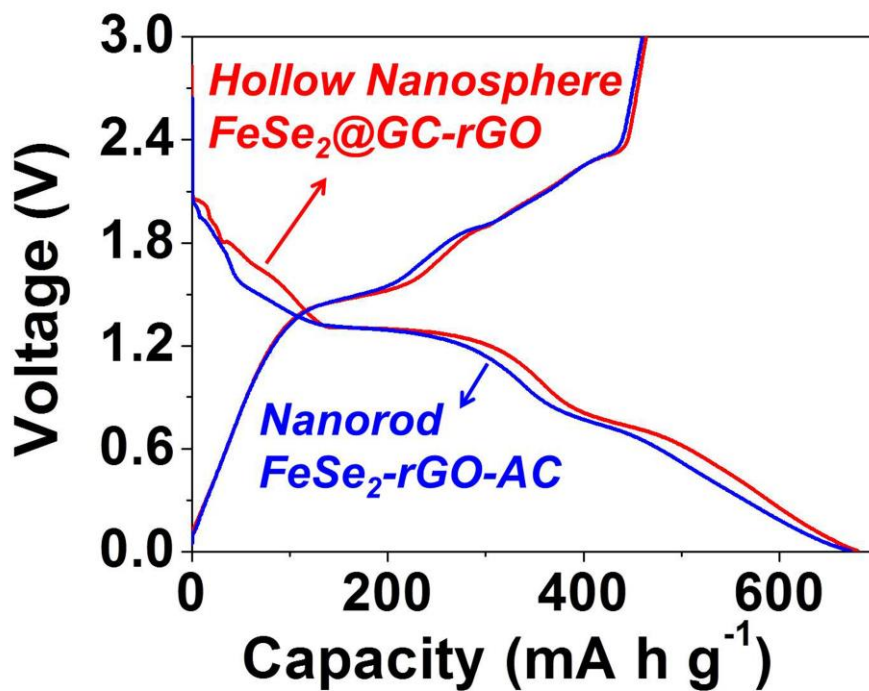

**Figure S11.** First charge-discharge curves of the hollow nanosphere FeSe<sub>2</sub>@GC-rGO hybrid nanofibers and nanorod FeSe<sub>2</sub>-rGO-AC hybrid nanofibers at a current density of 50 mA g<sup>-1</sup>.

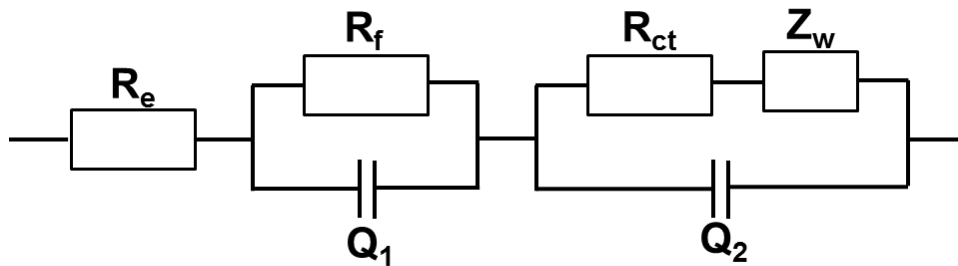

$R_e$  : the electrolyte resistance, corresponding to the intercept of high frequency semicircle at  $Z_{re}$  axis

$R_f$  : the SEI layer resistance corresponding to the high-frequency semicircle

$Q_1$  : the dielectric relaxation capacitance corresponding to the high-frequency semicircle

$R_{ct}$ : the denote the charger transfer resistance related to the middle-frequency semicircle

$Q_2$  : the associated double-layer capacitance related to the middle-frequency semicircle

$Z_w$  : the Na-ion diffusion resistance

**Figure S12.** Randle-type equivalent circuit model used for AC impedance fitting.
